# Supplementary material for: The structure of TRAF7 coiled-coil trimer provides insight into its function in zebrafish embryonic development
Source: PubMed Central journal article supplement (PMC11216086; doi:10.1093/jmcb/mjad083), 2024-01-04
Supplement: mjad083_supplemental_file.pdf [file mjad083_supplemental_file.pdf]

## Supplementary material

### **The structure of TRAF7 coiled-coil trimer provides insight into its function in zebrafish embryonic development**

Xiaozhen Song<sup>1,†</sup>, Ruixing Hu<sup>2,†</sup>, Yi Chen<sup>3,†</sup>, Man Xiao<sup>1</sup>, Hong Zhang<sup>1</sup>, Shengnan Wu<sup>1,\*</sup>, and Qing Lu<sup>2,\*</sup>

<sup>1</sup> Molecular Diagnostic Laboratory, Shanghai Children's Hospital, School of Medicine, Shanghai Jiao Tong University, Shanghai 200040, China

<sup>2</sup> Bio-X Institutes, Key Laboratory for the Genetics of Developmental and Neuropsychiatric Disorders (Ministry of Education), Shanghai Jiao Tong University, Shanghai 200030, China

<sup>3</sup> Laboratory of Development and Diseases and State Key Laboratory for Medical Genomics, Shanghai Institute of Hematology, Ruijin Hospital, Shanghai Jiao Tong University School of Medicine, Shanghai 200025, China

<sup>†</sup> These authors contributed equally to this work.

\* Correspondence to: Shengnan Wu, E-mail: [wushengnan@shchildren.com.cn](mailto:wushengnan@shchildren.com.cn); Qing Lu, E-mail: [luqing67@sjtu.edu.cn](mailto:luqing67@sjtu.edu.cn)

## Supplementary Tables

**Supplementary Table S1** Primer sequences used in zebrafish experiments.

|                             | Forward primer                                                                                                  | Reverse primer                                                                                      |
|-----------------------------|-----------------------------------------------------------------------------------------------------------------|-----------------------------------------------------------------------------------------------------|
| RT-PCR test                 | CAGCAGTCCCACAAGTAGCA                                                                                            | GCAGAATGTGTGTCCACAGG                                                                                |
| pCS2+ zebrafish traf7-res   | TAGCGAATTCGCCGCCACCCatggatgctggtttggatc                                                                         | TAGCCTCGAGGtagcacgtccacacctttac                                                                     |
| pCS2+ human TRAF7-res       | tagcGAATTCgccaccatgagctcaggcaagagtgccgc                                                                         | tagCTCGAGGtagcaagtccaaaccttcacagtgc                                                                 |
| pCS2+ human K346E TRAF7-res | F1: gacgaaaaccagagcagctcagcaggacct<br>F2: TACAAGCTACTTGTCTTTTTGCAGGA<br>TCCgccaccatgagctcaggcaagagtgcc          | R1: ggcctcgtgagctcgtctggtttcgtcc<br>R2: TTCTAGAGGCTCGAGAGGCCTTGAAT<br>TCtagcaagtccaaaccttcacagt     |
| pCS2+ human R371G TRAF7-res | F1: tcccacatcaacgcggggctgaacatgggcat<br>F2: TACAAGCTACTTGTCTTTTTGCAGGA<br>TCCgccaccatgagctcaggcaagagtgcc        | R1: tgcccatgttcagccccgcgttgatgtgggac<br>R2: TTCTAGAGGCTCGAGAGGCCTTGAAT<br>TCtagcaagtccaaaccttcacagt |
| pCS2+ human CCD TRAF7-res   | F1: tacgggtgcacgttcacatctacaccctcagcagatctcaag<br>F2: GCAGGATCCCATCGATTCGAATTCgcc<br>accatgagctcaggcaagagtgccgc | R1: gtcgtagatgaacgtgcaccgtacttgga<br>R2: TCACTATAGTTCTAGAGGCTCGAGGtag<br>caagtccaaaccttcacagt       |
| pClone007- traf7-WISH       | CCTCCATTGCTCACTATGAA                                                                                            | AGTAGATCGCCTGTCTGAATA                                                                               |

**Supplementary Table S2** Sequences of morpholino injected in zebrafish larvae.

| Morpholino           | Sequence                  |
|----------------------|---------------------------|
| <i>traf7</i> ATG-MO  | CATTTTGGCCTTGTTGGTGATGTCC |
| <i>traf7</i> E3i3-MO | TGGTCCAACAGTTAATACTGACCTT |
| <i>traf7</i> E4i4-MO | CAGAAGATTGCTGACACTCACCGTG |
| <i>traf7</i> 5MIS-MO | CATTaTcGCgTTGTTGcTcATGTCC |

## Supplementary Figures

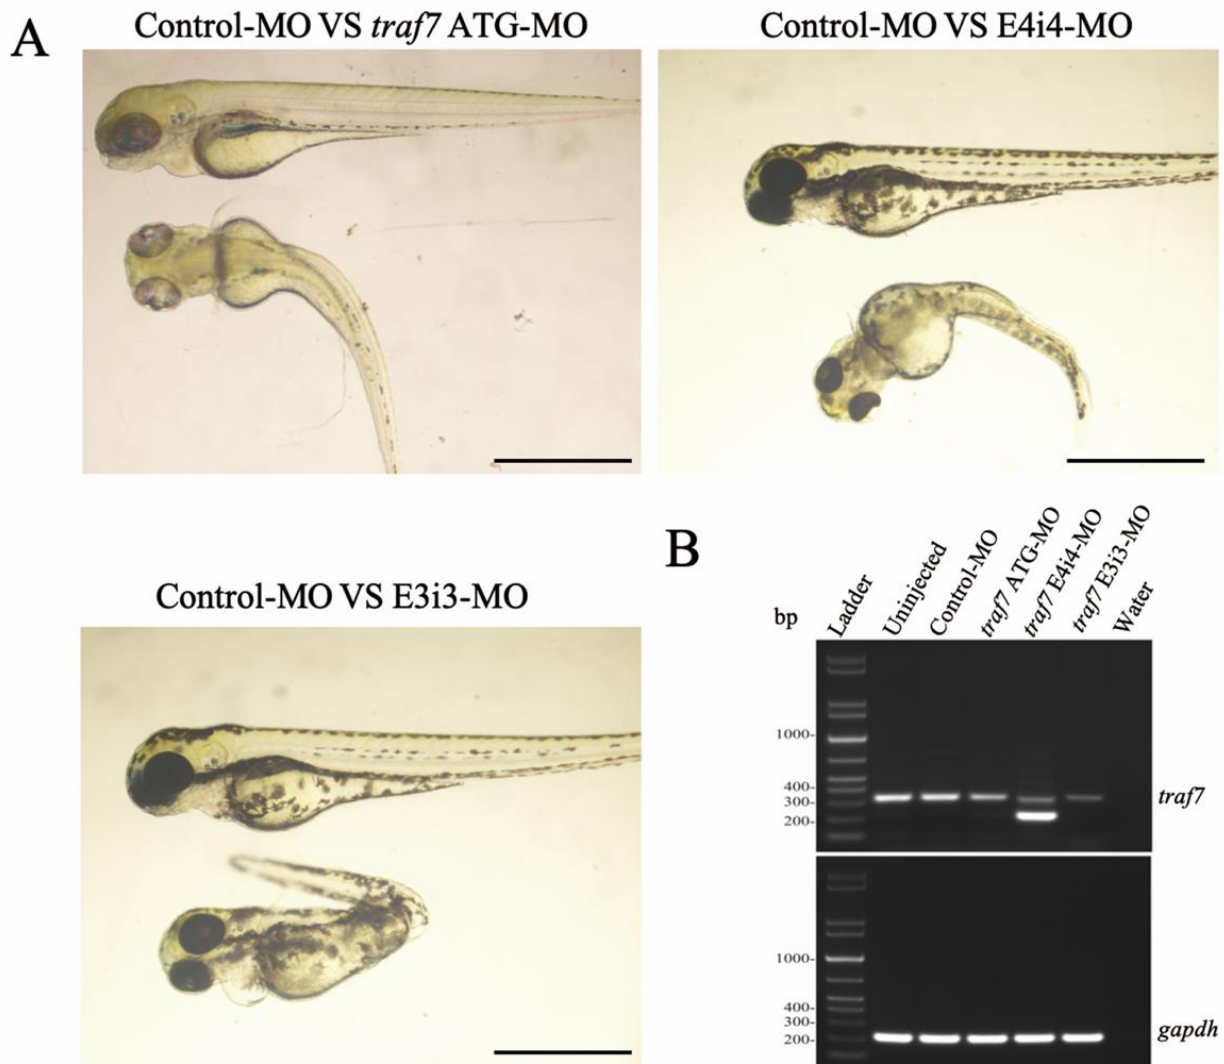

**Supplementary Figure S1** Loss of Traf7 in zebrafish induced abnormal embryonic development. (A) Compared with control-MO group, zebrafish showed similar abnormal phenotypes after injection with *traf7* ATG-MO, Splicing-blocking MO *traf7* E3i3-MO or *traf7* E4i4-MO at 3 dpf. Scale bar, 1mm. (B) RT-PCR for *traf7* expression in *traf7* E3i3-MO and *traf7* E4i4-MO injected zebrafish showed *traf7* expression effectively reduced compared to uninjected and Control-MO groups.

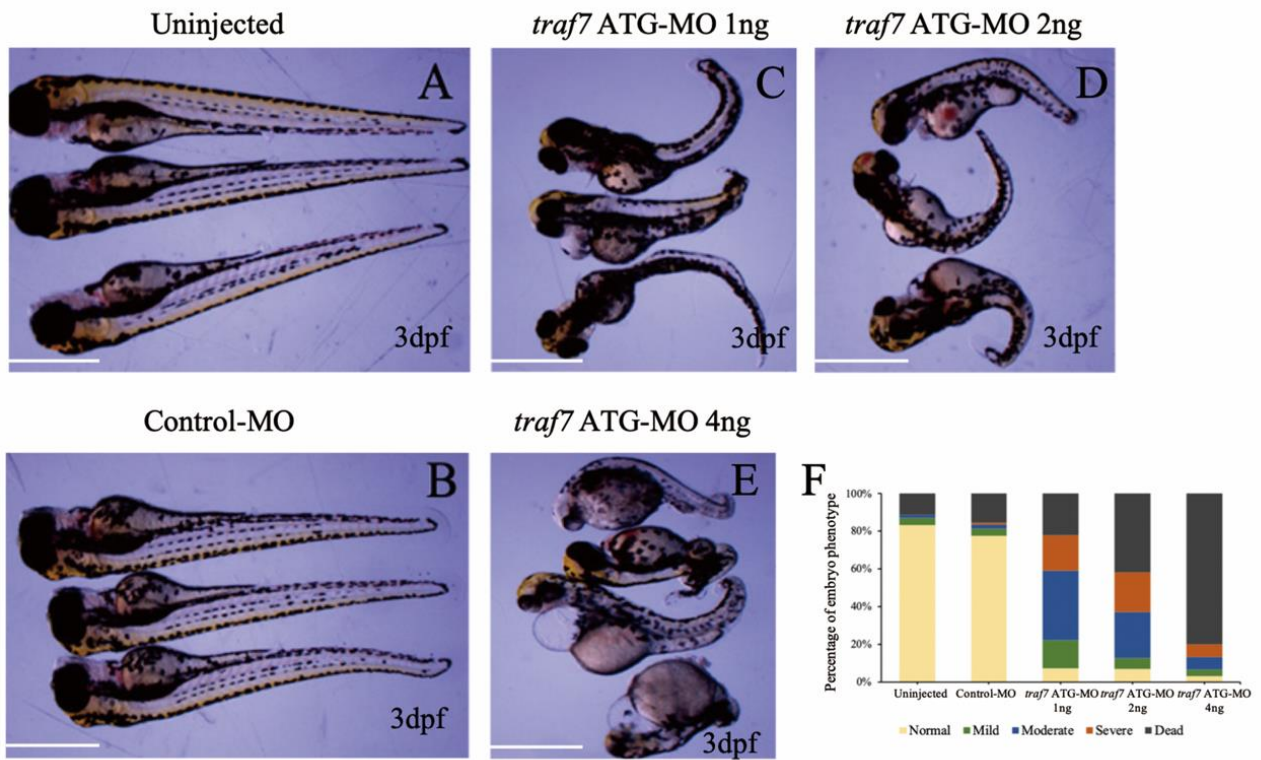

**Supplementary Figure S2** Morphology of *traf7* knockdown zebrafish based on *traf7* ATG-MO at 3 dpf. (A–E) The severity of morphology was dose dependent after injection of *traf7* ATG-MO. Scale bar, 1 mm. (F) The phenotypic classification of morphant.

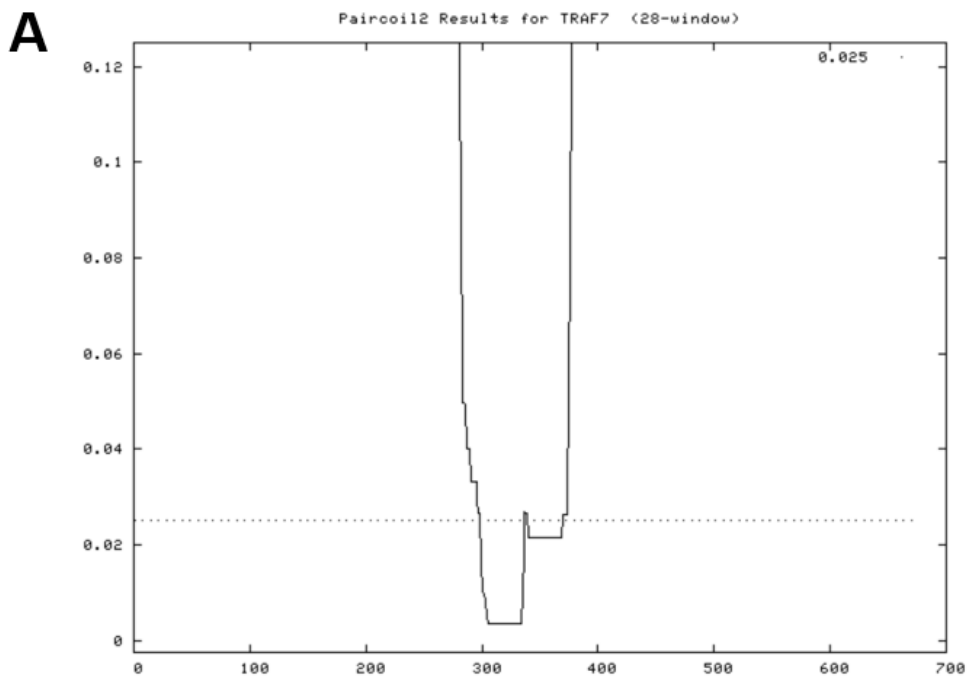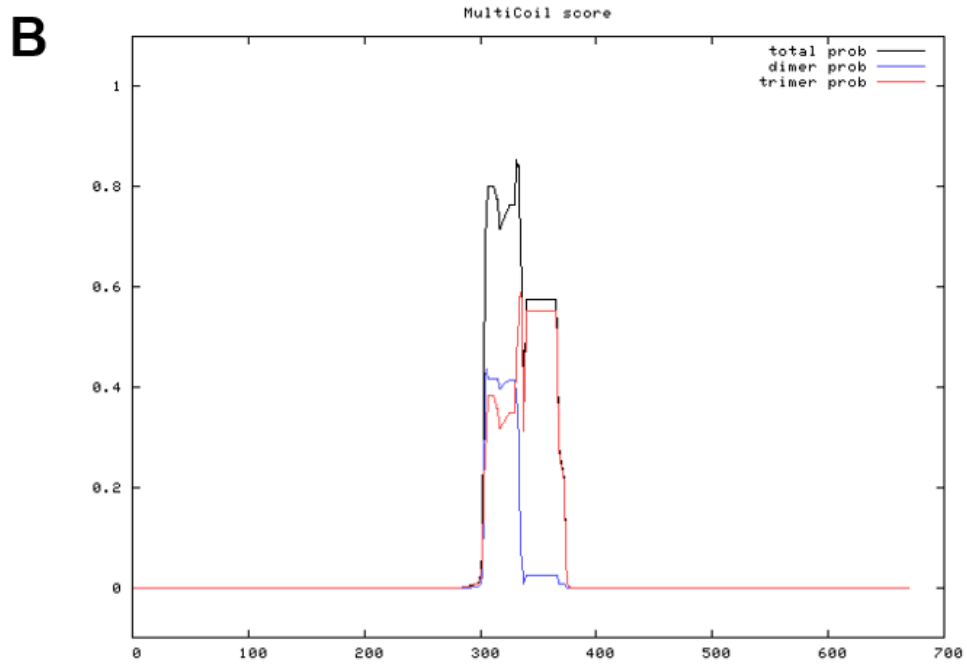

**Supplementary Figure S3** Prediction of TRAF7 CC region by Paircoil2 and MultiCoil.

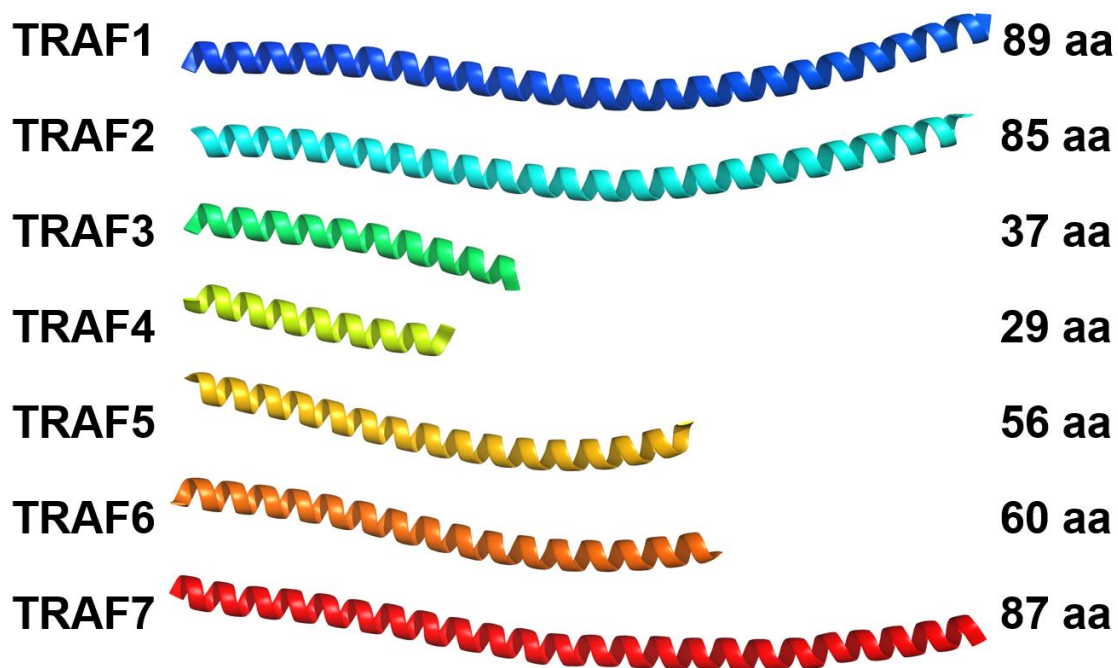

**Supplementary Figure S4** Structure overlay of CC domain among paralogs, based on AlphaFold predicted structure. Compared to TRAF1–6, TRAF7 CC (87 aa of each chain) contains many residues similar to TRAF1/2, and in experimental structure TRAF7 CC (91 aa of each chain) is longer than TRAF1-6.

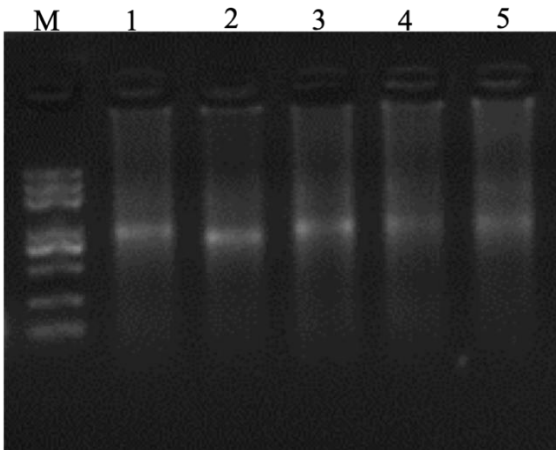

**Supplementary Figure S5** Agarose gel electrophoresis identification results of purified mRNA. The first lane M is DNA Marker: 100 bp, 250 bp, 500 bp, 750 bp, 1000 bp, 1500 bp, 2000 bp, 3000 bp, 5000 bp from bottom to top; Lanes named 1–5 were purified hTRAF7-WT, hTRAF7-CCD, hTRAF7-R371G, zTraf7-WT and hTRAF7-K346E mRNA, respectively.

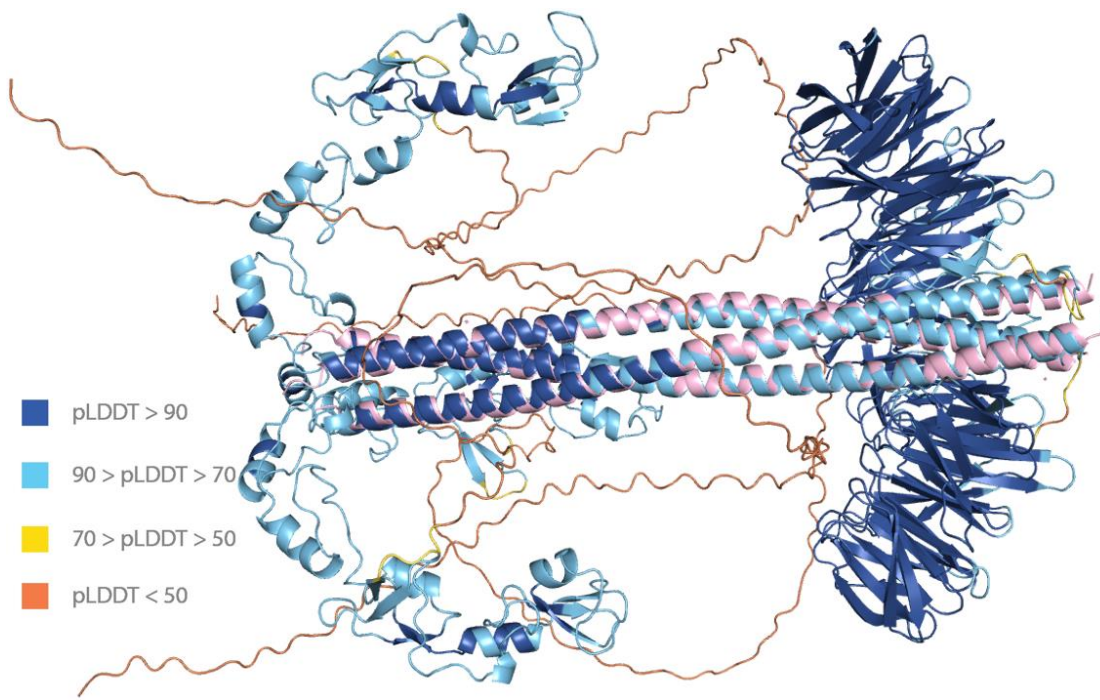

**Supplementary Figure S6** Experimental structure of TRAF7 trimer (colored light pink) aligned with AlphaFold2.3.1 computed structure.
